# Supplementary material for: NEDD4 E3 ligase-catalyzed NAMPT ubiquitination and autophagy activation are essential for pyroptosis-independent NAMPT secretion in human monocytes
Source: Springer Nature journal article supplement (doi:10.1186/s12964-025-02164-5), 2025-03-30
Supplement: MOESM1 [file 12964_2025_2164_MOESM1_ESM.pdf]

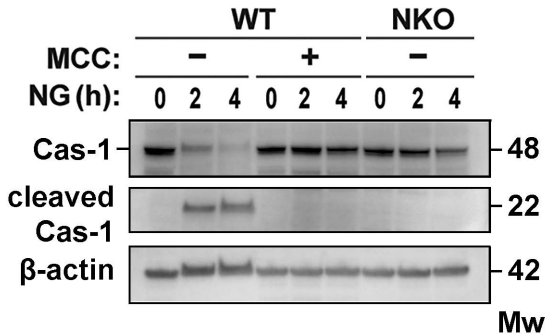

**Supplemental Figure S1. Nigericin induces caspase-1 cleavage via NLRP3.** Immunoblotting detection of caspase-1 cleavage. MCC-950-pretreated (20  $\mu$ M, 1 hr) and untreated WT and NKO THP-1 cells were stimulated with Nigericin (10  $\mu$ M) for 2 and 4 hours.

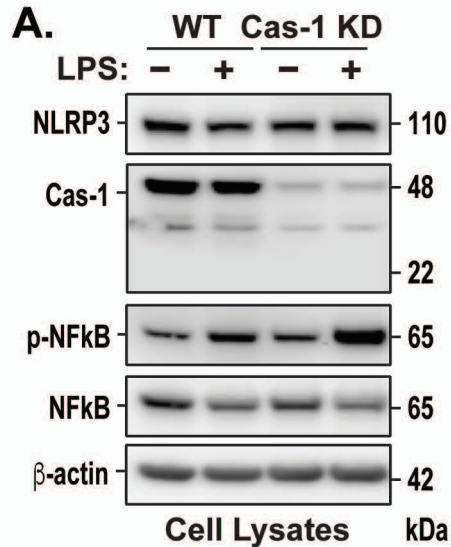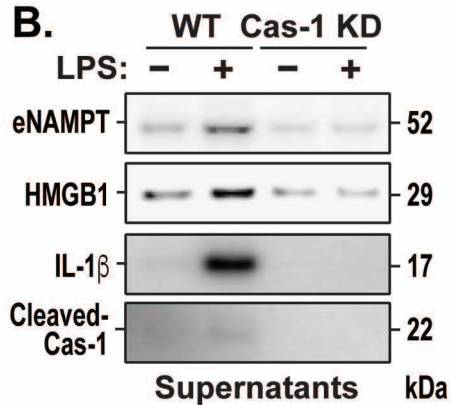

**Supplemental Figure S2. Caspase-1 deficiency reduces LPS-induced eNAMPT secretion.**

**(A)** THP-1 wild type (WT) and caspase-1 deficient (Cas-1 KD) cells were treated for 4 hr with 1  $\mu\text{g/mL}$  LPS. Caspase-1 deficiency in Cas-1 KD cells was confirmed by immunoblotting total cell lysates. Both WT and Cas-1 KD cells showed increased phosphorylation of NF- $\kappa\text{B}$  after LPS exposure. Immunoblots for total NF- $\kappa\text{B}$ , NLRP3, and  $\beta$ -actin are shown. **(B)** Supernatants from THP-1 WT and Cas-1 KD cells treated with LPS were immunoblotted for eNAMPT, HMGB1, cleaved IL-1 $\beta$  (active), and cleaved caspase-1. LPS-induced secretion of eNAMPT, HMGB1, and IL-1 $\beta$  was markedly reduced in Cas-1 KD cells, compared to WT cells.

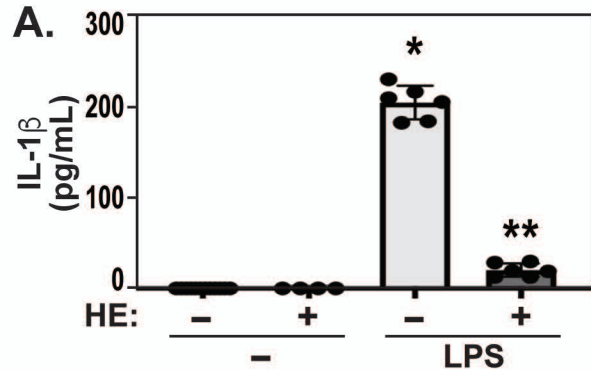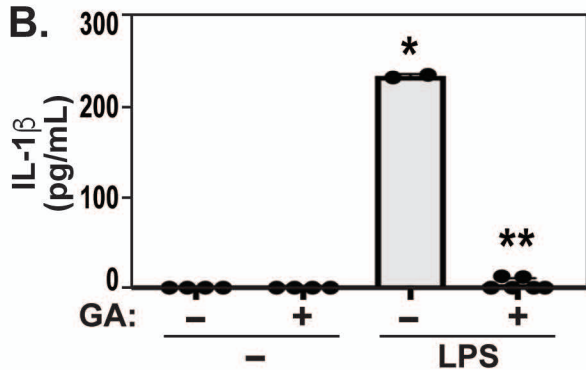

**Supplemental Figure S3. LPS-induced IL-1 $\beta$  secretion is inhibited by Heclin and Geldanamycin treatment.** (A/B) THP-1 WT cells were pretreated for 1 hr with either 50  $\mu$ M Heclin (HE) or 30  $\mu$ M Geldanamycin (GA), followed by 4 hr of treatment with 1  $\mu$ g/mL LPS. IL-1 $\beta$  concentrations in the supernatants were measured using MSD, and results are shown as the mean  $\pm$  SEM of four independent experiments.
